# Supplementary material for: Adaptives Testen von Textverständnis in der Grundschule
Source: Atypon-hosted journal article supplement (doi:10.1026/0012-1924/a000279), 2021-12-10
Supplement: 0012-1924_a000279_esm3.pdf [file 0012-1924_a000279_esm3.pdf]

*Elektronisches Supplement 3.* Verteilung der Items und Texte im Itempool auf die Inhaltsbereiche vor der Itemselektion.

| Item / Text | NT      | ST      | Gesamt    |
|-------------|---------|---------|-----------|
| TB          | 47 / 35 | 42 / 30 | 89 / 65   |
| SM          | 51 / 33 | 35 / 28 | 86 / 51   |
| Gesamt      | 98 / 58 | 77 / 50 | 175 / 108 |

*Anmerkungen:* Die Spaltenanzahl der Texte ergibt sich nicht aus der Spaltensumme, weil sich mehrere Items auf einen Text beziehen können. Die Inhaltsbereiche ergeben sich aus Textart (Narrativer Text [NT] oder Sachtext [ST]) und Verständnisebene (Textbasis [TB] oder Situationsmodell [SM])
