# Supplementary material for: Adaptives Testen von Textverständnis in der Grundschule
Source: Atypon-hosted journal article supplement (doi:10.1026/0012-1924/a000279), 2021-12-10
Supplement: 0012-1924_a000279_esm4.pdf [file 0012-1924_a000279_esm4.pdf]

### **1. Narrativer Text mit Aufgabe auf Situationsmodellebene**

In der großen Pause spielen Sarah und Max auf dem Schulhof mit dem Ball. Sarah wirft Max den Ball zu, den er aber nicht fängt. Max rennt dem Ball hinterher. Dabei stolpert er über seine Füße und fällt hin. Als Sarah zu Max hinläuft, sieht sie, dass er am Knie blutet. Sarah rennt aufgeregt zur Lehrerin und erzählt ihr, was passiert ist. „Oh je!“ sagt die Lehrerin und gibt ihr ein Pflaster für Max. Sarah geht zurück zu Max. Er ist beruhigt und sagt: „Es tut schon gar nicht mehr weh“. Dann ist die große Pause vorbei.

Warum ist Sarah aufgeregt?

- Weil sie mit der Lehrerin spricht.
- Weil sie mit Max spielt.
- Weil die Pause vorbei ist.
- Weil Max sich verletzt hat. (Korrekt)

### **2. Narrativer Text mit Aufgabe auf Textbasisebene**

Heute heiratet Julias älteste Schwester. Die ganze Familie ist mit den Vorbereitungen beschäftigt. Julias Mutter schmückt den Raum mit Lichterketten. Danach stellt Julias Vater die Stühle und Tische auf. Indessen verteilt Julia Blumensträuße im Raum. Julia und der Vater stoßen bei der Vorbereitung zusammen. Dann holt Julias Bruder die Getränke aus der Küche und der Opa macht Kerzen an. Nun kann die Feier beginnen.

Wann verteilt Julia die Blumensträuße?

- Als ihr Bruder die Getränke holt.
- Bevor ihre Mutter den Raum schmückt.
- Nachdem ihr Opa die Kerzen anmacht.
- Während ihr Vater die Stühle aufstellt. (Korrekt)

### **3. Sachtext mit Aufgabe auf Situationsmodellebene**

Glas ist sehr vielseitig. Unsere Fenster bestehen aus Glas, genau wie die Glühbirnen in Lampen. Wir trinken aus Gläsern und kaufen Getränke in Flaschen aus Glas. Glas wird für Brillengläser genutzt und für Uhren. Auch unsere Schränke und Spiegel bestehen zum Teil aus Glas. Sogar für Schmuck wird Glas verarbeitet.

Was wird im Text über Glas gesagt?

- Fenstern bestehen oft aus mehreren Glasscheiben.
- Flaschen aus Glas sind schwerer als Plastikflaschen.
- Dinge aus Glas sind oft leicht zerbrechlich.
- Glas kann verschiedene Formen haben. (Korrekt)

### **4. Sachtext mit Aufgabe auf Textbasisebene**

Delfine sind keine Fische. Sie sind Säugetiere, die im Wasser leben. Man bezeichnet sie als Meeressäuger. Delfine können sehr schnell schwimmen. Das macht sie zu guten Jägern. Die meisten Delfine fressen Fische oder kleine Tintenfische. Wenn sie Beute gefangen haben, fressen Delfine sie in einem Stück auf.

Was wird im Text über Delfine gesagt?

- Delfine jagen oft in kleinen Gruppen zusammen.
- Delfine können schneller schwimmen als Haie.
- Delfine sind mit Walen verwandt.
- Delfine können ganze Fische schlucken. (Korrekt)

**Beispiele für schwierigkeitsgenerierende Merkmale in den vier Inhaltsbereichen des Textverständnisitempools**

**Item 1:**

Textlänge: 97 Wörter

Satzlänge: 10.8 Wörter

Verständnisebene: Situationsmodell

Art des Inferenzschlusses: „Character emotion inference“

Anzahl relevanter Sätze: 3

Position relevanter Sätze: In der Mitte der Passage

**Item 2:**

Textlänge: 65 Wörter

Satzlänge: 8.1 Wörter

Syntaktische Merkmale: Viele Konjunktionen

Wörter der Bildungssprache: „Indessen“

**Item 3:**

Textlänge: 50 Wörter

Satzlänge: 8.3 Wörter

Verständnisebene: Situationsmodell

Art des Inferenzschlusses: Reflexion über die Textaussage

**Item 4:**

Textlänge: 47 Wörter

Satzlänge: 6.7 Wörter

Anzahl relevanter Sätze: 1

Position relevanter Sätze: Im letzten Satz
