# Supplementary material for: Adaptives Testen von Textverständnis in der Grundschule
Source: Atypon-hosted journal article supplement (doi:10.1026/0012-1924/a000279), 2021-12-10
Supplement: 0012-1924_a000279_esm6.pdf [file 0012-1924_a000279_esm6.pdf]

*Elektronisches Supplement 6. Itemselektion mit zwei verschiedenen Root Mean Square Deviation (RMSD) Kriterien.*

| Selektionskriterium                                     | Variante 1 (original)                                                                                   | Varinate 2 (nach Revision)                                                                                   |
|---------------------------------------------------------|---------------------------------------------------------------------------------------------------------|--------------------------------------------------------------------------------------------------------------|
| <b>Schritt 1</b>                                        |                                                                                                         |                                                                                                              |
| RMSD < .15<br>(Yamamoto, Khorramdel & von Davier, 2013) | 019, 064, 056                                                                                           |                                                                                                              |
| RMSD < .08<br>(Köhler, Robitzsch & Hartig, 2020)        |                                                                                                         | 001, 011, 019, 056, 064, 102, 103, 104, 108, 119, 120, 125, 126, 130, 131, 136, 138, 145, 148, 158, 164, 175 |
| <b>Schritt 2</b>                                        |                                                                                                         |                                                                                                              |
| $a_i > 0.5$                                             | 026, 031, 035, 039, 057, 060, 065, 069, 073, 097, 108, 139, 140, 141, 147, 148, 155, 157, 158, 159, 176 | 026, 031, 035, 039, 057, 065, 069, 073, 097, 100, 139, 141, 147, 157, 159, 176                               |
| <b>Schritt 3</b>                                        |                                                                                                         |                                                                                                              |
| Itemparameterdrift<br>K3 versus K4                      | 021, 037, 126                                                                                           | 021, 037                                                                                                     |
| Geschlechter-DIF                                        | 030, 071                                                                                                | 030, 071, 135                                                                                                |
| Familiensprache Deutsch-DIF                             | -                                                                                                       | -                                                                                                            |
| Totale Anzahl Items                                     | 145                                                                                                     | 132                                                                                                          |

*Anmerkungen.* Die Zahlen in Spalte 2 und 3 sind eindeutige Identifikationsnummern. Die Identifikationsnummern sind nicht strickt fortlaufend von 1–175.

**Referenzen**

- Köhler, C., Robitzsch, A. & Hartig, J. (2020). A bias-corrected RMSD item fit statistic: An evaluation and comparison to alternatives. *Journal of Educational and Behavioral Statistics*, 45(3), 251–273.
- Yamamoto, K., Khorramdel, L. & Von Davier, M. (2013). Scaling PIAAC cognitive data. In OECD (Eds.), *Technical report of the survey of adult skills (PIAAC)* (pre-publication copy; pp. 408–440). Verfügbar unter [https://www.oecd.org/skills/piaac/\\_Technical%20Report\\_17OCT13.pdf](https://www.oecd.org/skills/piaac/_Technical%20Report_17OCT13.pdf)
