# Supplementary material for: Adaptives Testen von Textverständnis in der Grundschule
Source: Atypon-hosted journal article supplement (doi:10.1026/0012-1924/a000279), 2021-12-10
Supplement: 0012-1924_a000279_esm7.pdf [file 0012-1924_a000279_esm7.pdf]

*Elektronisches Supplement 7. Itemparameter des 3PL-IRT-Modells.*

| Num. | Inhalt | $n$ | $b_i$ | KI             | $a_i$ | KI           |
|------|--------|-----|-------|----------------|-------|--------------|
| 1    | NTSM   | 200 | -2.00 | [-2.42, -1.58] | 1.31  | [0.90, 1.72] |
| 2    | NTSM   | 317 | 0.75  | [-0.46, -1.04] | 0.79  | [0.53, 1.05] |
| 3    | NTTB   | 301 | 0.39  | [-0.08, -0.69] | 1.07  | [0.75, 1.39] |
| 4    | NTSM   | 305 | -0.62 | [-0.97, -0.26] | 1.93  | [1.40, 2.47] |
| 5    | NTTB   | 320 | 0.21  | [-0.09, -0.51] | 1.13  | [0.81, 1.45] |
| 6    | NTSM   | 369 | 0.51  | [-0.24, -0.78] | 0.98  | [0.72, 1.24] |
| 7    | NTSM   | 327 | 0.03  | [-0.24, -0.31] | 0.88  | [0.60, 1.17] |
| 8    | NTSM   | 395 | -0.64 | [-0.94, -0.33] | 1.83  | [1.38, 2.27] |
| 9    | NTTB   | 296 | -0.07 | [-0.36, -0.23] | 0.97  | [0.66, 1.29] |
| 10   | NTTB   | 201 | -1.73 | [-2.14, -1.31] | 1.56  | [1.10, 2.03] |
| 11   | NTSM   | 297 | -0.82 | [-1.13, -0.51] | 1.06  | [0.71, 1.41] |
| 12   | NTSM   | 352 | 0.43  | [-0.16, -0.70] | 0.83  | [0.58, 1.08] |
| 13   | NTTB   | 300 | -0.45 | [-0.78, -0.11] | 1.61  | [1.14, 2.08] |
| 14   | NTSM   | 308 | 0.09  | [-0.19, -0.36] | 0.66  | [0.40, 0.91] |
| 15   | NTSM   | 381 | 0.60  | [-0.34, -0.86] | 0.85  | [0.60, 1.09] |
| 16   | NTTB   | 387 | 0.10  | [-0.16, -0.37] | 1.18  | [0.88, 1.48] |
| 17   | NTSM   | 384 | 0.59  | [-0.31, -0.86] | 1.31  | [1.02, 1.60] |
| 18   | NTTB   | 351 | -1.27 | [-1.59, -0.96] | 1.10  | [0.74, 1.46] |
| 19   | NTTB   | 387 | -1.70 | [-2.04, -1.37] | 1.32  | [0.94, 1.70] |
| 20   | NTSM   | 367 | -0.55 | [-0.88, -0.22] | 2.10  | [1.54, 2.66] |
| 21   | NTSM   | 368 | 1.23  | [-0.93, -1.52] | 0.85  | [0.60, 1.09] |
| 22   | NTTB   | 354 | -0.15 | [-0.40, -0.10] | 0.63  | [0.39, 0.88] |
| 23   | NTTB   | 312 | -0.22 | [-0.53, -0.10] | 1.51  | [1.08, 1.94] |
| 24   | NTTB   | 318 | -0.2  | [-0.52, -0.12] | 1.57  | [1.13, 2.02] |
| 25   | NTTB   | 389 | -0.97 | [-1.25, -0.69] | 1.18  | [0.85, 1.51] |
| 26   | NTTB   | 439 | 0.02  | [-0.22, -0.26] | 0.92  | [0.68, 1.16] |

| Num. | Inhalt | $n$ | $b_i$ | KI             | $a_i$ | KI           |
|------|--------|-----|-------|----------------|-------|--------------|
| 27   | NTSM   | 204 | -1.32 | [-1.88, -0.75] | 4.30  | [2.91, 5.69] |
| 28   | NTTB   | 328 | -0.85 | [-1.18, -0.52] | 1.69  | [1.22, 2.16] |
| 29   | NTSM   | 314 | -0.35 | [-0.62, -0.09] | 0.53  | [0.28, 0.78] |
| 30   | NTSM   | 315 | 0.04  | [-0.26, -0.33] | 1.12  | [0.79, 1.46] |
| 31   | NTTB   | 308 | -0.01 | [-0.28, -0.27] | 0.76  | [0.48, 1.05] |
| 32   | NTTB   | 200 | -2.20 | [-2.70, -1.70] | 2.50  | [1.83, 3.16] |
| 33   | NTSM   | 166 | -0.80 | [-1.33, -0.28] | 1.80  | [1.06, 2.53] |
| 34   | NTSM   | 372 | 0.20  | [-0.07, -0.47] | 1.08  | [0.80, 1.37] |
| 35   | NTSM   | 200 | 0.49  | [-0.14, -0.83] | 0.53  | [0.14, 0.91] |
| 36   | NTTB   | 313 | -0.29 | [-0.59, -0.02] | 1.30  | [0.92, 1.69] |
| 37   | NTSM   | 202 | -1.06 | [-1.48, -0.63] | 2.10  | [1.35, 2.84] |
| 38   | NTSM   | 323 | 0.76  | [-0.47, -1.05] | 0.97  | [0.70, 1.25] |
| 39   | NTTB   | 202 | -1.73 | [-2.29, -1.17] | 4.25  | [3.02, 5.48] |
| 40   | NTTB   | 202 | -1.42 | [-1.86, -0.98] | 2.19  | [1.50, 2.89] |
| 41   | NTTB   | 202 | -2.51 | [-3.06, -1.95] | 3.80  | [2.87, 4.74] |
| 42   | NTTB   | 382 | -1.31 | [-1.60, -1.01] | 1.13  | [0.79, 1.48] |
| 43   | NTSM   | 395 | -0.51 | [-0.77, -0.25] | 1.04  | [0.74, 1.34] |
| 44   | NTTB   | 201 | -1.86 | [-2.29, -1.43] | 1.97  | [1.43, 2.50] |
| 45   | NTSM   | 201 | -0.62 | [-0.97, -0.27] | 1.07  | [0.61, 1.53] |
| 46   | NTSM   | 389 | 1.27  | [-0.98, -1.56] | 0.79  | [0.55, 1.03] |
| 47   | STSM   | 200 | 2.16  | [-1.54, -2.78] | 0.79  | [0.25, 1.32] |
| 48   | STTB   | 317 | 2.89  | [-2.42, -3.35] | 1.50  | [1.21, 1.79] |
| 49   | STSM   | 204 | 0.63  | [-0.27, -0.99] | 0.56  | [0.16, 0.97] |
| 50   | STTB   | 321 | 0.70  | [-0.37, -1.04] | 1.74  | [1.32, 2.17] |
| 51   | STTB   | 367 | 1.10  | [0.80, 1.40]   | 1.21  | [0.94, 1.48] |
| 52   | STTB   | 372 | 0.41  | [0.16, 0.67]   | 0.87  | [0.61, 1.12] |
| 53   | STSM   | 301 | 1.24  | [0.87, 1.60]   | 1.68  | [1.30, 2.07] |
| 54   | STTB   | 201 | -1.45 | [-1.85, -1.06] | 1.48  | [1.02, 1.93] |

| Num. | Inhalt | $n$ | $b_i$ | KI             | $a_i$ | KI           |
|------|--------|-----|-------|----------------|-------|--------------|
| 55   | STTB   | 375 | 1.43  | [-1.12, 1.74]  | 1.62  | [1.31, 1.92] |
| 56   | STTB   | 320 | 1.29  | [0.96, 1.61]   | 0.64  | [0.37, 0.90] |
| 57   | STTB   | 303 | 0.11  | [-0.18, 0.40]  | 0.95  | [0.63, 1.26] |
| 58   | STSM   | 298 | 2.32  | [1.88, 2.76]   | 1.10  | [0.82, 1.39] |
| 59   | STSM   | 314 | 0.87  | [0.53, 1.20]   | 1.85  | [1.45, 2.25] |
| 60   | STSM   | 378 | 2.40  | [2.02, 2.77]   | 1.78  | [1.49, 2.08] |
| 61   | STSM   | 356 | 2.08  | [1.70, 2.46]   | 1.43  | [1.14, 1.72] |
| 62   | STSM   | 319 | 1.48  | [1.14, 1.82]   | 1.60  | [1.28, 1.92] |
| 63   | STTB   | 313 | 0.41  | [0.10, 0.71]   | 1.41  | [1.04, 1.78] |
| 64   | STSM   | 201 | 0.87  | [0.42, 1.31]   | 1.88  | [1.26, 2.50] |
| 65   | STTB   | 318 | 0.36  | [0.01, 0.70]   | 1.95  | [1.47, 2.44] |
| 66   | STSM   | 307 | 1.95  | [1.56, 2.33]   | 1.36  | [1.05, 1.67] |
| 67   | STSM   | 366 | -0.10 | [-0.43, 0.23]  | 2.27  | [1.71, 2.84] |
| 68   | STTB   | 355 | 0.68  | [0.41, 0.94]   | 0.71  | [0.47, 0.94] |
| 69   | STTB   | 303 | 1.23  | [0.89, 1.57]   | 1.37  | [1.04, 1.70] |
| 70   | STSM   | 321 | 1.55  | [1.18, 1.92]   | 1.76  | [1.41, 2.11] |
| 71   | STTB   | 301 | 0.79  | [0.48, 1.09]   | 0.71  | [0.44, 0.98] |
| 72   | STTB   | 321 | 0.20  | [-0.09, 0.48]  | 0.95  | [0.66, 1.25] |
| 73   | STSM   | 201 | 0.73  | [0.34, 1.12]   | 0.87  | [0.44, 1.29] |
| 74   | STTB   | 362 | -0.35 | [-0.64, -0.06] | 1.44  | [1.04, 1.83] |
| 75   | STTB   | 363 | 0.55  | [0.25, 0.85]   | 1.51  | [1.16, 1.87] |
| 76   | STSM   | 314 | -0.05 | [-0.36, 0.25]  | 1.35  | [0.96, 1.74] |
| 77   | STTB   | 314 | 0.48  | [0.17, 0.80]   | 1.50  | [1.12, 1.88] |
| 78   | STTB   | 311 | -0.22 | [-0.54, 0.10]  | 1.45  | [1.04, 1.87] |
| 79   | STSM   | 347 | -0.33 | [-0.61, -0.05] | 1.20  | [0.84, 1.55] |
| 80   | STTB   | 372 | -1.38 | [-1.71, -1.06] | 1.77  | [1.33, 2.20] |
| 81   | NTSM   | 143 | 1.03  | [0.58, 1.48]   | 1.21  | [0.84, 1.58] |
| 82   | NTSM   | 169 | 0.10  | [-0.34, 0.53]  | 1.46  | [0.98, 1.94] |

| Num. | Inhalt | $n$ | $b_i$ | KI             | $a_i$ | KI           |
|------|--------|-----|-------|----------------|-------|--------------|
| 83   | NTSM   | 161 | -1.21 | [-1.81, -0.61] | 2.02  | [1.14, 2.90] |
| 84   | NTTB   | 167 | 0.18  | [-0.20, 0.56]  | 0.81  | [0.50, 1.13] |
| 85   | NTTB   | 176 | 0.38  | [-0.04, 0.79]  | 1.37  | [0.96, 1.79] |
| 86   | NTTB   | 156 | 1.15  | [0.68, 1.61]   | 1.57  | [1.17, 1.97] |
| 87   | NTSM   | 181 | -0.09 | [-0.45, 0.27]  | 0.75  | [0.42, 1.08] |
| 88   | NTTB   | 180 | 0.68  | [0.30, 1.06]   | 1.05  | [0.72, 1.37] |
| 89   | NTSM   | 186 | 0.62  | [0.25, 0.98]   | 0.80  | [0.51, 1.09] |
| 90   | NTSM   | 264 | 0.61  | [0.27, 0.95]   | 1.42  | [1.09, 1.76] |
| 91   | NTTB   | 173 | 0.15  | [-0.20, 0.51]  | 0.55  | [0.27, 0.83] |
| 92   | NTTB   | 165 | 0.46  | [0.09, 0.82]   | 0.53  | [0.25, 0.80] |
| 93   | NTTB   | 180 | 1.89  | [1.42, 2.37]   | 2.17  | [1.73, 2.60] |
| 94   | NTSM   | 173 | 0.36  | [-0.15, 0.87]  | 2.59  | [1.81, 3.37] |
| 95   | NTTB   | 196 | 0.50  | [0.13, 0.87]   | 1.07  | [0.74, 1.41] |
| 96   | NTTB   | 174 | 0.50  | [0.08, 0.92]   | 1.40  | [0.99, 1.82] |
| 97   | STSM   | 170 | -0.11 | [-0.47, 0.25]  | 0.55  | [0.25, 0.84] |
| 98   | STSM   | 164 | 0.96  | [0.53, 1.38]   | 1.34  | [0.98, 1.70] |
| 99   | STTB   | 186 | 1.09  | [0.71, 1.47]   | 0.84  | [0.54, 1.13] |
| 100  | STTB   | 171 | 0.60  | [0.14, 1.06]   | 1.77  | [1.25, 2.30] |
| 101  | STTB   | 174 | 0.33  | [-0.03, 0.70]  | 0.7   | [0.40, 1.00] |
| 102  | STSM   | 162 | 2.49  | [1.99, 3.00]   | 1.68  | [1.33, 2.03] |
| 103  | NTTB   | 159 | 0.93  | [0.51, 1.35]   | 1.21  | [0.86, 1.55] |
| 104  | STSM   | 152 | 0.54  | [0.12, 0.96]   | 1.00  | [0.67, 1.33] |
| 105  | STSM   | 175 | 0.48  | [0.10, 0.86]   | 0.98  | [0.64, 1.32] |
| 106  | STTB   | 163 | 1.28  | [0.85, 1.70]   | 0.50  | [0.22, 0.79] |
| 107  | NTTB   | 114 | 0.79  | [0.24, 1.34]   | 1.81  | [1.27, 2.35] |
| 108  | NTTB   | 112 | 1.43  | [0.83, 2.03]   | 2.20  | [1.61, 2.78] |
| 109  | NTTB   | 116 | -0.22 | [-0.66, 0.23]  | 0.53  | [0.19, 0.87] |
| 110  | NTTB   | 117 | 1.21  | [0.68, 1.75]   | 1.96  | [1.43, 2.49] |

| Num. | Inhalt | $n$ | $b_i$ | KI            | $a_i$ | KI           |
|------|--------|-----|-------|---------------|-------|--------------|
| 111  | NTSM   | 127 | 0.34  | [-0.11, 0.79] | 0.96  | [0.59, 1.33] |
| 112  | STTB   | 115 | 1.29  | [0.80, 1.77]  | 0.63  | [0.33, 0.94] |
| 113  | STTB   | 116 | -0.14 | [-0.58, 0.31] | 0.57  | [0.23, 0.91] |
| 114  | STTB   | 94  | 0.61  | [0.08, 1.15]  | 1.10  | [0.66, 1.54] |
| 115  | STTB   | 116 | 0.59  | [0.07, 1.12]  | 1.51  | [1.01, 2.01] |
| 116  | STSM   | 123 | 0.79  | [0.35, 1.22]  | 0.52  | [0.23, 0.82] |
| 117  | STSM   | 106 | 0.66  | [0.17, 1.14]  | 0.90  | [0.55, 1.26] |
| 118  | NTTB   | 128 | 0.28  | [-0.21, 0.77] | 1.31  | [0.85, 1.78] |
| 119  | NTTB   | 88  | 0.86  | [0.31, 1.41]  | 1.12  | [0.68, 1.56] |
| 120  | NTTB   | 101 | 1.06  | [0.53, 1.58]  | 1.29  | [0.86, 1.72] |
| 121  | NTSM   | 100 | 1.94  | [1.36, 2.52]  | 1.67  | [1.23, 2.11] |
| 122  | NTSM   | 103 | 1.89  | [1.33, 2.44]  | 1.30  | [0.94, 1.67] |
| 123  | NTSM   | 106 | 2.11  | [1.56, 2.67]  | 1.40  | [1.02, 1.78] |
| 124  | STTB   | 124 | -0.42 | [-1.01, 0.17] | 1.75  | [0.98, 2.52] |
| 125  | STTB   | 110 | 1.05  | [0.47, 1.63]  | 2.15  | [1.52, 2.78] |
| 126  | STTB   | 107 | 0.96  | [0.46, 1.46]  | 1.15  | [0.76, 1.55] |
| 127  | STTB   | 101 | 2.44  | [1.82, 3.05]  | 1.37  | [1.02, 1.72] |
| 128  | STSM   | 102 | 2.06  | [1.48, 2.63]  | 1.01  | [0.68, 1.35] |
| 129  | STSM   | 105 | 0.77  | [0.18, 1.35]  | 1.89  | [1.29, 2.50] |
| 130  | STSM   | 111 | 3.02  | [2.44, 3.61]  | 2.07  | [1.69, 2.45] |
| 131  | STSM   | 111 | 3.56  | [2.90, 4.21]  | 2.29  | [1.88, 2.71] |
| 132  | NTSM   | 118 | 0.54  | [0.05, 1.03]  | 1.41  | [0.93, 1.89] |

*Anmerkungen:* Num. = laufende Nummer, Inhaltsbereich Inhalt: NT = Narrativer Text, ST = Sachtext, TB = Textbasis, SM = Situationsmodell,  $n$  = Anzahl der Schülerinnen und Schüler, die das Item beantwortet haben,  $b_i$  = Schwierigkeitsparameter,  $a_i$  = Diskriminationsparameter, KI = 95 %-Konfidenzintervall.
