# Supplementary material for: Adaptives Testen von Textverständnis in der Grundschule
Source: Atypon-hosted journal article supplement (doi:10.1026/0012-1924/a000279), 2021-12-10
Supplement: 0012-1924_a000279_esm8.pdf [file 0012-1924_a000279_esm8.pdf]

*Elektronisches Supplement 8. Detaillierte Ergebnisse zur Konstruktvalidierung.*

Die Hypothesen 1–4 werden auf Basis der Korrelationen untersucht, die in Tabelle 1 für die drei Teilstichproben abgebildet sind. Die Korrelation wurden mit Hilfe der Pakete *lavaan* (Rosseel, 2012) und *lavaan.survey* (Oberski, 2014) in R (R Core Team, 2020) bestimmt. Für die Schätzung der Korrelationen und deren Standardfehler wurde eine Maximum Likelihood (ML) Verfahren verwendet. Das ML-Verfahren ermöglicht die Berücksichtigung der fehlenden Werte (Methode: Full Information Maximum Likelihood [FIML]; Lüdtke, Robitzsch, Trautwein & Köller, 2007) und der hierarchischen Stichprobenstruktur (Oberski, 2014). Fehlende Werte sind in ESM 7 dokumentiert. Die hierarchische Stichprobenstruktur wurde auf Klassenebene berücksichtigt. Alle berichteten Korrelationen sind signifikant unterschiedlich von Null.

Die Hypothesen 1–4 beziehen sich auf die Unterschiedlichkeit von Korrelationen. Die Unterschiedlichkeit wurde mit Williams  $t$  für abhängige Korrelationen, die eine gemeinsame Variable teilen, bestimmt (Williams, 1959). Zusätzlich ermöglichen die 95-prozentigen Konfidenzintervalle der Korrelationen eine Abschätzung der Unterschiedlichkeit zwischen Korrelationen.

Hypothese 5 wird auf Basis des Vergleichs von zwei Regressionsmodellen mit gemischten Effekten zwischen dem Textverständnis gemessen mit dem Itempool (TVIP) und dem ELFE 1-6 als Kriterium sowie den Validierungsmaßen (Maß) als Prädiktoren untersucht. Verglichen werden die Konfidenzintervalle der standardisierten Regressionsgewichte des WLLP-Rs unter Kontrolle der anderen Validierungsmaße (KGFf und KGFv). Überlappen sich die Konfidenzintervalle nicht, kann davon ausgegangen werden, dass WLLP-R unter Kontrolle der anderen Validierungsmaße einen unterschiedlichen Zusammenhang mit TVIP zeigt wie mit dem ELFE 1-6.

*Tabelle 1.* Korrelationen mit ihren Konfidenzintervallen (95 %) zwischen Testverständnis (TVIP und ELFE), Dekodiergeschwindigkeit (WLLP-R), verbale kognitiven Grundfähigkeiten (KGFv) und figuralen kognitiven Grundfähigkeiten (KGFf) nach Erhebung (E1 & E2) und Klassenstufe (K3 & K4).

|          | Instrument               | 2              | 3              | 4              | 5              |
|----------|--------------------------|----------------|----------------|----------------|----------------|
| E1<br>K3 | 1. TVIP                  | .61 [.56, .66] | .46 [.40, .51] |                | .25 [.18, .32] |
|          | 2. ELFE 1-6 <sup>1</sup> |                | .60 [.56, .65] |                | .22 [.15, .29] |
|          | 3. WLLP-R <sub>1</sub>   |                |                |                | .18 [.11, .25] |
|          | 4. KGFv <sup>2,3</sup>   |                |                |                |                |
|          | 5. KGFf <sup>1</sup>     |                |                |                |                |
|          | Instrument               | 2              | 3              | 4              | 5              |
| E2<br>K3 | 1. TVIP                  | .57 [.51, .63] | .49 [.38, .60] |                | .22 [.10, .35] |
|          | 2. ELFE 1-6 <sup>1</sup> |                | .66 [.60, .71] |                | .28 [.17, .38] |
|          | 3. WLLP-R <sub>1</sub>   |                |                |                | .21 [.09, .33] |
|          | 4. KGFv <sup>2,3</sup>   |                |                |                |                |
|          | 5. KGFf <sup>1</sup>     |                |                |                |                |
|          | Instrument               | 2              | 3              | 4              | 5              |
| E2<br>K4 | 1. TVIP                  | .60 [.53, .66] | .47 [.37, .58] | .60 [.53, .67] | .45 [.39, .51] |
|          | 2. ELFE                  |                | .54 [.47, .61] | .61 [.54, .67] | .30 [.21, .39] |
|          | 3. WLLP                  |                |                | .46 [.37, .55] | .24 [.16, .31] |
|          | 4. KGFv                  |                |                |                | .42 [.35, .48] |
|          | 5. KGFf                  |                |                |                |                |

*Anmerkungen:* Alle Korrelationen sind signifikant ( $p < .001$ ). Klammern enthalten die untere und obere Schwelle des 95-prozentigen Konfidenzintervalls. <sup>1</sup> Korrelation der einzelnen Testversionen (A, B) weichen nicht signifikant von den berichteten Korrelationen ab. <sup>2</sup> KGF verbal sind aufgrund von geringer interner Konsistenz ( $\alpha = .43$ ) nicht berichtet. <sup>3</sup> KGF verbal wurde in E2 K3 nicht erhoben.

*Tabelle 2.* Tabelle mit Tests der Hypothesen (H) auf Unterschiedlichkeit zwei Korrelationen bzw. zu einem Punktwert in den drei Teilstichproben (E1 K3, E2 K3 & E2 K4).

| Hypothesen (H)                                | E1 K3                 | E2 K3                 | E2 K4                 |
|-----------------------------------------------|-----------------------|-----------------------|-----------------------|
| <b>H1:</b>                                    |                       |                       |                       |
| $r_{\text{TVIP-ELFE}} > r_{\text{TVIP-WLLP}}$ | $t = 7.04, p < .001$  | $t = 1.98, p = .049$  | $t = 4.13, p < .001$  |
| $r_{\text{TVIP-KGFv}} > r_{\text{TVIP-KGFf}}$ | -                     | -                     | $t = 4.26, p < .001$  |
| $r_{\text{TVIP-KGFf}} > r_{\text{TVIP-WLLP}}$ | $t = 6.12, p < .001$  | $t = 4.04, p < .001$  | $t = 0.47, p = .641$  |
| <b>H2:</b>                                    |                       |                       |                       |
| $r_{\text{TVIP-ELFE}} > .50^*$                | $t = 4.43, p < .001$  | $t = 2.45, p = .015$  | $t = 2.95, p < .001$  |
| <b>H3:</b>                                    |                       |                       |                       |
| $r_{\text{TVIP-WLLP}} > .30^*$                | $t = 5.47, p < .001$  | $t = 3.44, p = .001$  | $t = 3.19, p = .001$  |
| $r_{\text{TVIP-KGFv}} > .30^*$                | -                     | -                     | $t = 8.61, p < .001$  |
| <b>H4:</b>                                    |                       |                       |                       |
| $r_{\text{TVIP-KGFf}} < .50$                  | $t = -6.84, p < .001$ | $t = -4.36, p < .001$ | $t = -1.64, p = .102$ |

*Anmerkungen:* *t*-Werte durch Williams *t* bestimmt. \*Schwellenwerte basieren auf sprachlichen Konventionen nach Cohen (1988;  $r = 0.1$  für eine geringe Korrelation,  $r = 0.3$  für eine mittlere Korrelation,  $r = 0.5$  für eine hohe Korrelation).

Tabelle 3. Vergleich von zwei Regressionsmodellen mit gemischten mit Textverständnis gemessen mit dem Itempool (TVIP) und dem ELFE 1-6 als Kriterium sowie den Validierungsmaßen (Maß) als Prädiktoren.

| Kriterium | Stichprobe | Maß    | $\beta$ | [UG<br>OG]     | $t$  | $p$  | $mR^2$ | $\sigma^2_k$ | $N_{sus}$ | mis<br>% | $N_k$ |
|-----------|------------|--------|---------|----------------|------|------|--------|--------------|-----------|----------|-------|
| TVIP      | E1 K3      | KGff   | 0.1     | [0.15<br>0.20] | 6.2  | <.00 | .23    | .05          | 103       | 6.31     | 5     |
|           |            | WLLP-R | 0.4     | [0.39<br>0.45] | 14.9 | <.00 |        |              |           |          | 7     |
|           |            |        | 2       |                | 9    | 1    |        |              |           |          | 7     |
|           | E2 K3      | KGff   | 0.1     | [0.07<br>0.17] | 2.2  | .02  | .27    | .06          | 278       | 0        | 2     |
|           |            | WLLP-R | 0.4     | [0.43<br>0.54] | 8.9  | <.00 |        |              |           |          | 7     |
|           |            |        | 2       |                | 3    | 3    |        |              |           |          | 2     |
|           | E2 K4      | KGff   | 0.2     | [0.19<br>0.26] | 6.7  | <.00 | .44    | .05          | 566       | 3.89     | 3     |
|           |            | KGfV   | 0.4     | [0.36<br>0.44] | 10.5 | <.00 |        |              |           |          | 6     |
|           |            | WLLP-R | 0.2     | [0.19<br>0.27] | 5.7  | <.00 |        |              |           |          | 7     |
|           |            | 0      |         | 1              | 1    | 6    |        |              |           |          |       |
|           |            | 3      |         | 5              | 1    |      |        |              |           |          |       |
|           |            | 3      |         | 5              | 1    |      |        |              |           |          |       |

  

|         | Stich-<br>probe | Maß    | $\beta$ | [UG<br>OG]     | $t$  | $p$  | $mR^2$ | $\sigma^2_k$ | $N_{sus}$ | mis<br>% | $N_k$ |
|---------|-----------------|--------|---------|----------------|------|------|--------|--------------|-----------|----------|-------|
| ELFE1-6 | E1 K3           | KGff   | 0.1     | [0.08<br>0.13] | 4.3  | <.00 | .35    | 0.0          | 103       | 6.58     | 5     |
|         |                 | WLLP-R | 0.5     | [0.54<br>0.59] | 22.2 | <.00 |        |              |           |          | 9     |
|         |                 |        | 6       |                | 5    | 1    |        |              |           |          | 7     |
|         | E2 K3           | KGff   | 0.1     | [0.07<br>0.16] | 2.5  | .01  | .47    | 0.0          | 274       | 1.44     | 2     |
|         |                 | WLLP-R | 0.6     | [0.63<br>0.72] | 14.3 | <.00 |        |              |           |          | 1     |
|         |                 |        | 8       |                | 4    | 1    |        |              |           |          | 2     |
|         | E2 K4           | KGff   | 0.0     | [0.00<br>0.07] | 1.1  | .24  | .52    | 0.1          | 566       | 3.89     | 3     |
|         |                 | KGfV   | 0.4     | [0.38<br>0.45] | 11.1 | <.00 |        |              |           |          | 5     |
|         |                 | WLLP-R | 0.5     | [0.47<br>0.55] | 12.5 | <.00 |        |              |           |          | 9     |
|         |                 | 4      |         | 4              | 1    | 6    |        |              |           |          |       |
|         |                 | 1      |         | 3              | 1    |      |        |              |           |          |       |
|         |                 | 1      |         | 3              | 1    |      |        |              |           |          |       |

Anmerkungen: Aufgrund des geringen Anteils fehlender Werte wurden Fälle listenweise ausgeschlossen. Regressionsmodelle mit gemischten Effekten (Bates, Mächler, Bolker & Walker, 2014). Teilstichproben: E = Erhebung und K = Klassenstufe.  $\beta$  = standardisierte Regressionsgewicht, [UG OG] = untere und obere Grenze des 95 %-Konfidenzintervalls,  $t$  =  $t$ -Wert,  $p$  =  $p$ -Wert.  $mR^2$  = marginale  $R^2$  der fixed-effects (Edwards, Muller, Wolfinger, Qaqish & Schabenberger, 2008).  $\sigma^2_k$  = Varianz des Klassenzufallseffekts,  $N_{sus}$  = Stichprobengröße, mis% = fehlender Werte, und  $N_k$  = Anzahl der Klassen.

## Referenzen

- Bates, D., Mächler, M., Bolker, B. & Walker, S. (2014). Fitting linear mixed-effects models using lme4. *arXiv preprint arXiv:1406.5823*.
- Cohen, S. (1988). Perceived stress in a probability sample of the United States. In S. Spacapan & S. Os-kamp (Eds.), *The Claremont Symposium on Applied Social Psychology. The social psychology of health* (p. 31–67). Sage Publications, Inc.
- Edwards, L. J., Muller, K. E., Wolfinger, R. D., Qaqish, B. F. & Schabenberger, O. (2008). An R2 statistic for fixed effects in the linear mixed model. *Statistics in medicine*, 27(29), 6137–6157.
- Lüdtke, O., Robitzsch, A., Trautwein, U. & Köller, O. (2007). Umgang mit fehlenden Werten in der psychologischen Forschung. *Psychologische Rundschau*, 58(2), 103–117.
- Oberski, D. (2014). lavaan. survey: An R package for complex survey analysis of structural equation models. *Journal of statistical software*, 57(1), 1–27.
- R-Core-Team (2020). *R: A Language and Environment for Statistical Computing*. Wien: R Foundation for Statistical Computing.
- Rosseel, Y. (2012). Lavaan: An R package for structural equation modeling and more. Version 0.5–12. *Journal of statistical software*, 48(2), 1–36.
- Williams, E. J. (1959) *Regression analysis*. New York: Wiley.
